# Supplementary material for: The Continuing Debate on Deep Molluscan Phylogeny: Evidence for Serialia (Mollusca, Monoplacophora + Polyplacophora)
Source: Hindawi journal article supplement (doi:10.1155/2013/407072), 2013-01-01
Supplement: f1 [file 407072.f1.pdf]

Supplementary Figure 1A

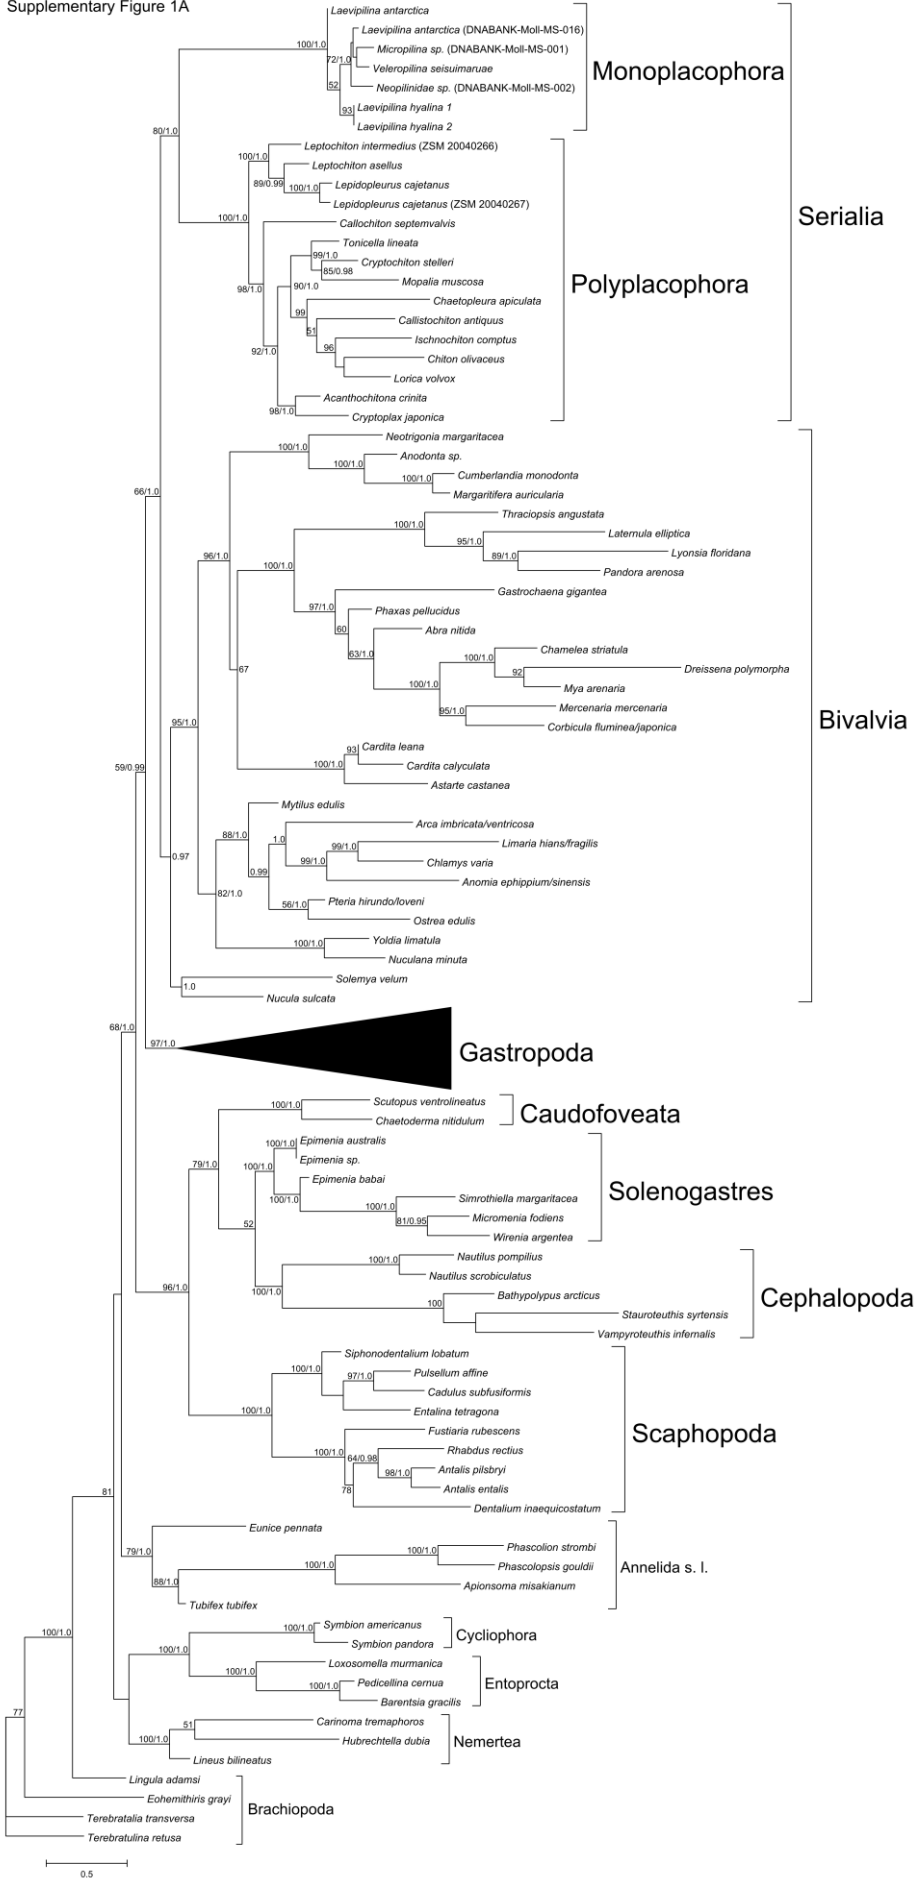

Supplementary Figure 1B

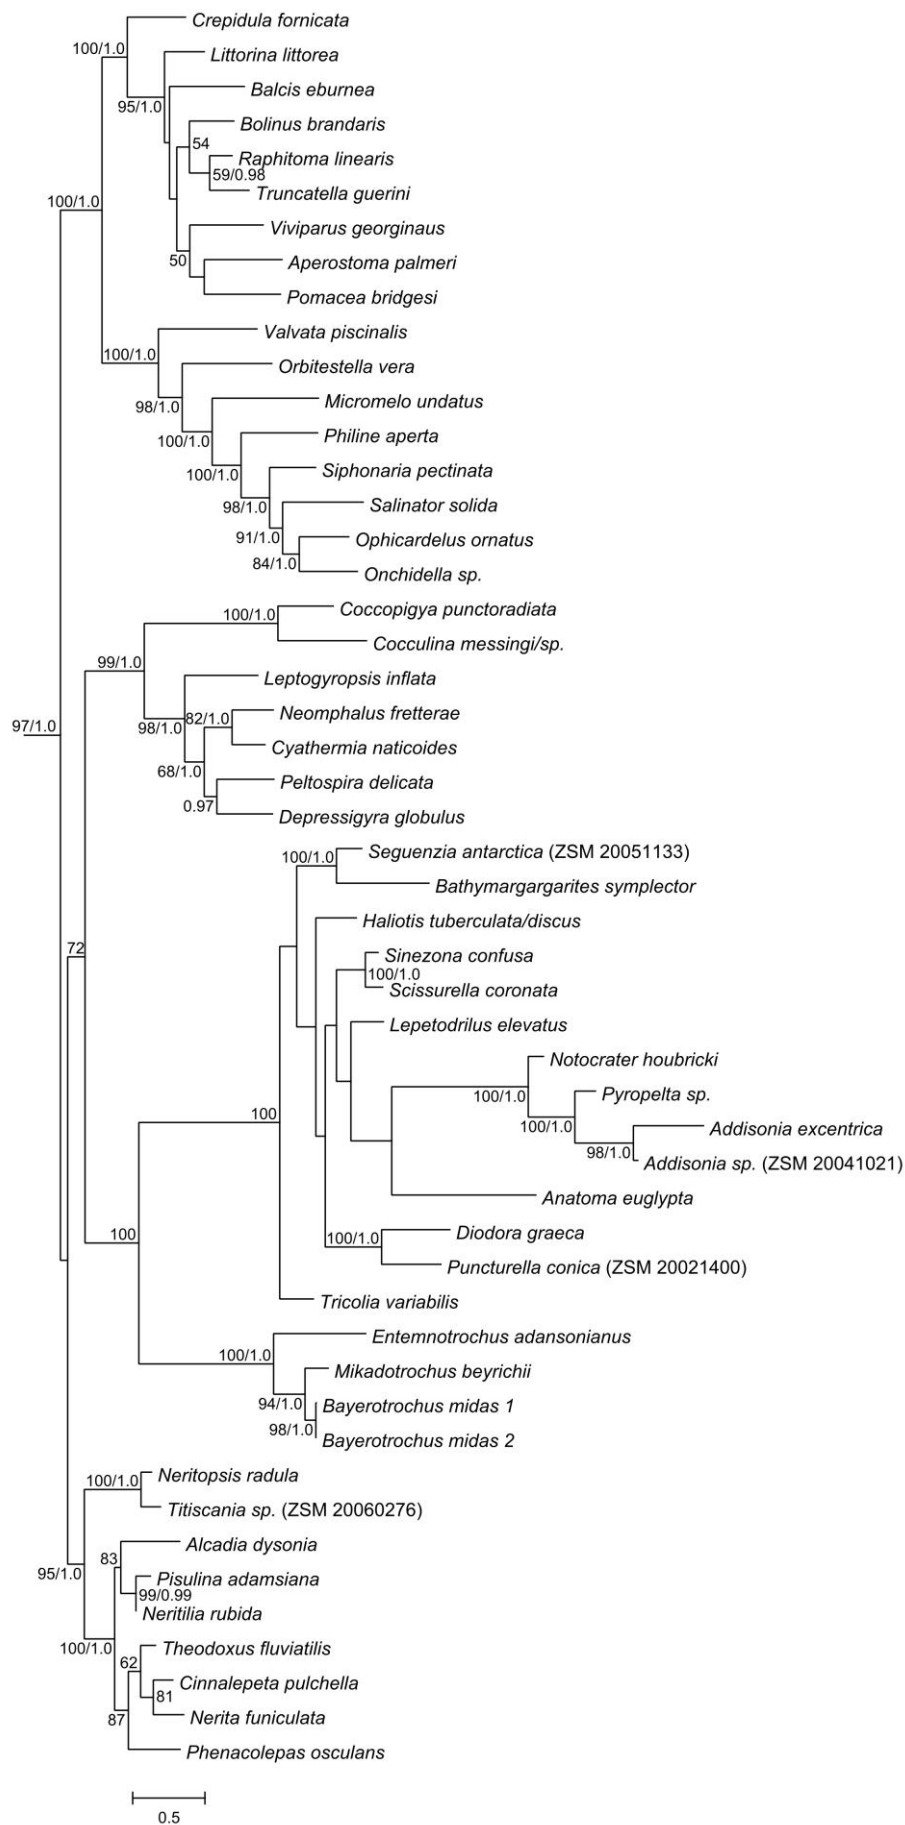

Supplementary Figure 2

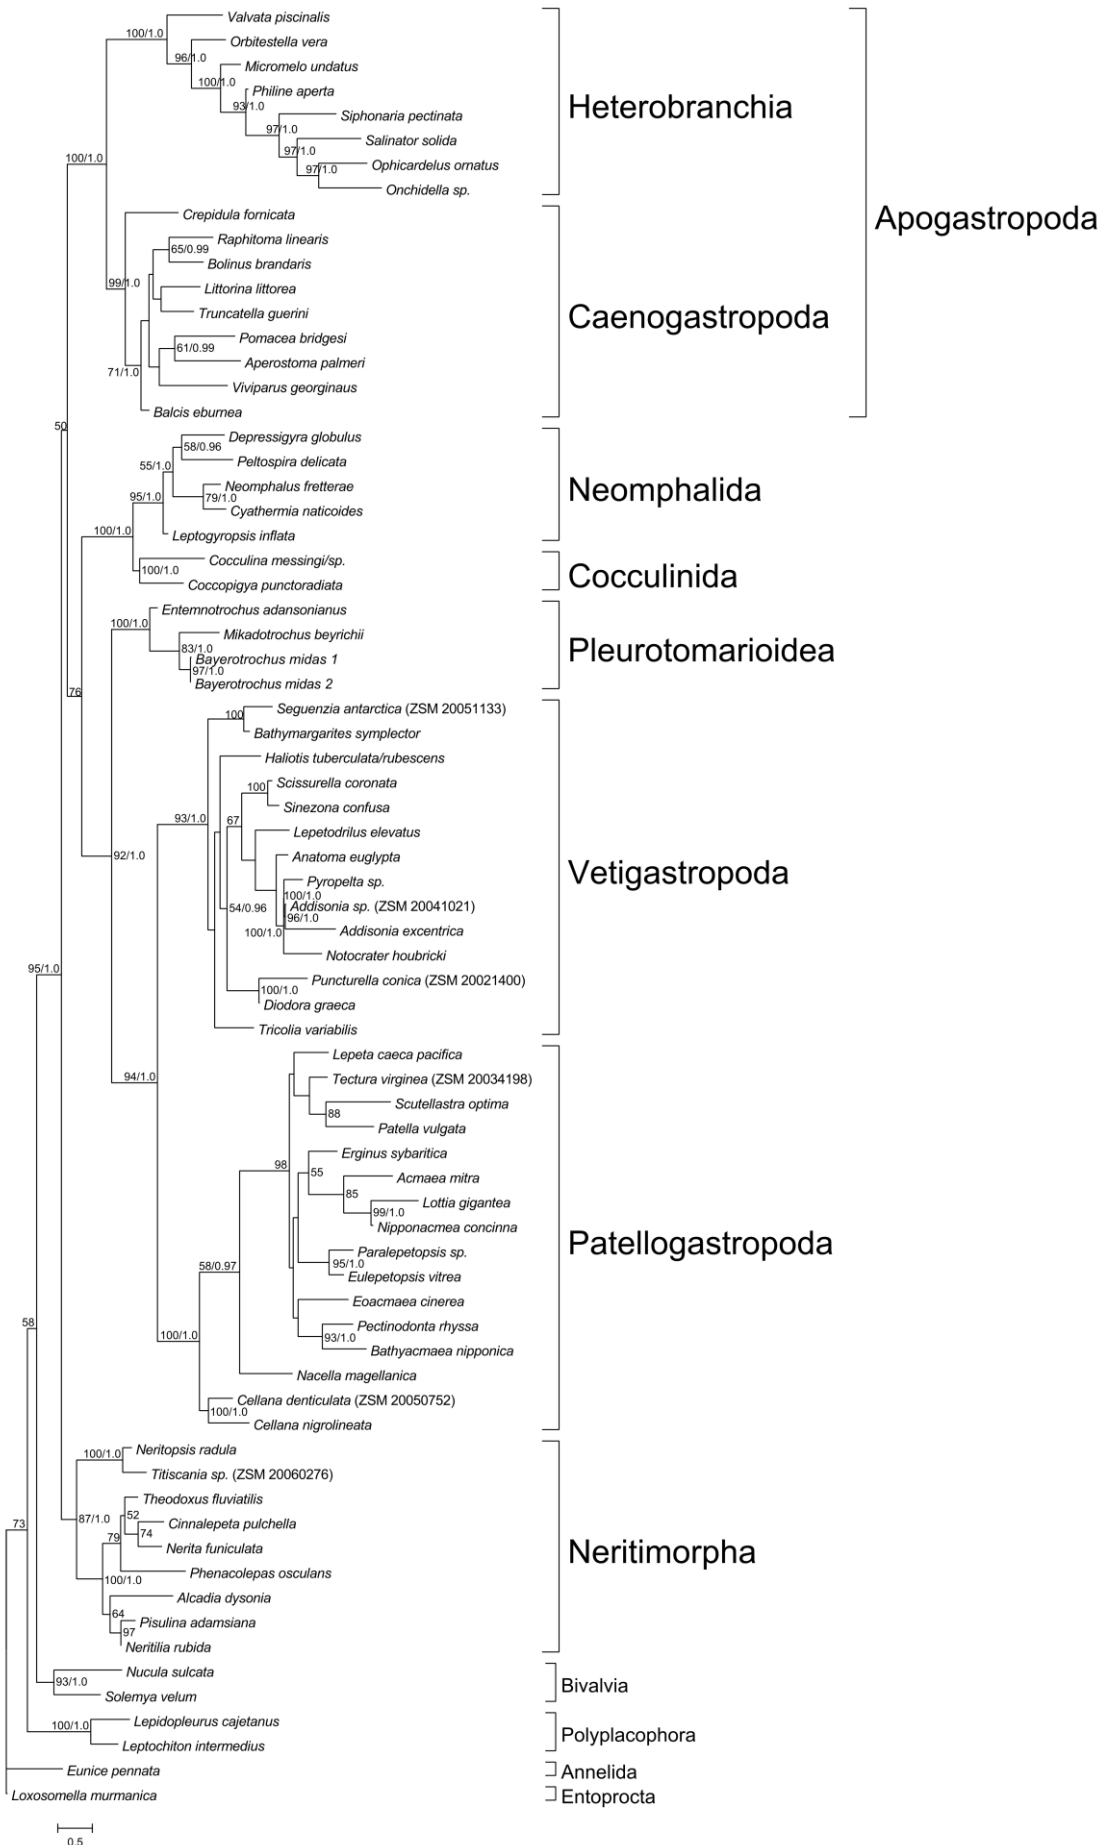

## Supplementary Table 1

| <b>Fragment</b> | <b>Primer</b> | <b>Primer sequence</b>               |
|-----------------|---------------|--------------------------------------|
| 28S rRNA small  | 28SF          | 5'-GAC CCG TCT TGA AGC ACG-3'        |
|                 | 28SR          | 5'-CCA CAG CGC CAG TTC TGC TTA C-3'  |
| 28S rRNA large  | 28SF2         | 5'-ACC TAT TCT CAA ACT TTA AAT GG-3' |
|                 | 28SR2         | 5'-GAC TTC CCT TAC CTA CAT-3'        |
| 18S rRNA part A | 18Sa2.0       | 5'-ATG GTT GCA AAG CTG AAA C-3'      |
|                 | 18S9R         | 5'-GAT CCT TCC GCA GGT TCA CCT AC-3' |
| 18S rRNA part B | 18S1F         | 5'-TAC CTG GTT GAT CCT GCC AGT AG-3' |
|                 | 18S5R         | 5'-CTT GGC AAA TGC TTT CGC-3'        |
| 18S rRNA part C | 18S3F         | 5'-GTT CGA TTC CGG AGA GGG A-3'      |
|                 | 18Sbi         | 5'-GAG TCT CGT TCG TTA TCG GA-3'     |
| 16S rRNA        | 16Sa          | 5'-CGC CTG TTT ATC AAA AAC AT-3'     |
|                 | 16Sb          | 5'-CTC CGG TTT GAA CTC AGA TCA-3'    |
| H3              | H3aF          | 5'-ATG GCT CGT ACC AAG CAG ACV GC-3' |
|                 | H3aR          | 5'-ATA TCC TTR GGC ATR ATR GTG AC-3' |

### PCR conditions

|                  |      |            |
|------------------|------|------------|
| Initial step     | 94°C | 6min       |
| Denaturation     | 94°C | 1min       |
| Annealing        | 50°C | 1min       |
| Elongation       | 72°C | 1min 30sec |
| Final elongation | 72°C | 6min       |
| Cycles           |      | 45         |

Supplementary Table 2

| Species          |                                  | 18S      | 28S1     | 28S2     | 28S3     | 28S4     | H3       | COI      | 16S      |
|------------------|----------------------------------|----------|----------|----------|----------|----------|----------|----------|----------|
| <b>Outgroups</b> |                                  |          |          |          |          |          |          |          |          |
| Annelida         | <i>Eunice pennata</i>            | AY040684 | AY340391 |          |          |          | DQ779731 |          | AF321418 |
|                  | <i>Tubifex tubifex</i>           | GQ355437 | GQ355465 | GQ355465 |          |          |          | EF179544 | EU117545 |
| Brachiopoda      | <i>Eohemithiris grayi</i>        | AF025936 | AY839242 | AY839242 | AY839242 |          |          |          |          |
|                  | <i>Lingula adamsi</i>            | U08329   |          |          |          |          |          |          |          |
|                  | <i>Terebratalia transversa</i>   | FJ196115 | AF342802 | AF342802 | AF342802 | AF342802 |          | FJ196085 |          |
|                  | <i>Terebratulina retusa</i>      | U08324   | AY839244 | AY839244 | AY839244 |          | DQ779768 |          | AF334238 |
| Cycliophora      | <i>Symbion americanus</i>        | EF142068 |          | EF142087 | EF142087 |          |          | EF140778 | EF140771 |
|                  | <i>Symbion pandora</i>           | Y14811   |          | AY218133 |          |          |          | AY218084 |          |
| Entoprocta       | <i>Barentsia gracilis</i>        | FJ196109 | AY210456 | AY210456 | AY210456 | AY210456 |          | FJ196079 |          |
|                  | <i>Loxosomella murmanica</i>     | AY218100 | DQ279950 | DQ279950 | DQ279950 | DQ279950 | AY218150 |          |          |
|                  | <i>Pedicellina cernua</i>        | FJ196111 |          |          |          |          |          | FJ196081 |          |
| Nemertea         | <i>Carinoma tremaphoros</i>      | AY039675 | AJ436888 | AJ436888 |          |          | AJ436986 | AJ436943 | AJ436833 |
|                  | <i>Hubrechtella dubia</i>        | AY039674 | AJ436889 | AJ436889 |          |          |          | EU489495 | AJ436834 |
|                  | <i>Lineus bilineatus</i>         |          | DQ279947 | DQ279947 |          |          | DQ279996 | DQ280014 | DQ280022 |
| Sipuncula        | <i>Apionsoma misakianum</i>      | AY210440 | AY210454 | AY210454 | AY210454 | AY210454 | DQ300052 | EU267000 |          |
|                  | <i>Phascolion strombi</i>        | DQ299984 | AY210468 | AY210468 | AY210468 | AY210468 | DQ279998 |          |          |
|                  | <i>Phascolopsis gouldii</i>      | AF342796 | AF342795 | AF342795 | AF342795 | AF342795 | AF519297 | DQ300134 |          |
| <b>Mollusca</b>  |                                  |          |          |          |          |          |          |          |          |
| Bivalvia         | <i>Abra nitida</i>               | DQ279940 | DQ279965 |          | DQ279965 | DQ279965 | DQ280005 |          |          |
|                  | <i>Anodonta sp.</i>              | AY579090 | DQ279964 |          |          |          | AY579132 | AY579122 |          |
|                  | <i>Anomia ephippium/sinensis</i> | AF120535 | AB102739 |          | AB102739 | AB102739 |          |          |          |
|                  | <i>Arca imbricata/ventricosa</i> | AY654986 | AB101612 |          | AB101612 | AB101612 | AY654989 | AY654988 |          |
|                  | <i>Astarte castanea</i>          | AF120551 | AF131001 |          |          |          | DQ280004 | AF120662 |          |
|                  | <i>Cardita calyculata</i>        | AF120549 |          | AF120610 |          |          |          | AF120660 |          |
|                  | <i>Cardita leana</i>             | AM774481 | AM779655 |          |          |          |          |          |          |
|                  | <i>Chamelea striatula</i>        | DQ279943 |          | DQ279967 | DQ279967 | DQ279967 | DQ280009 | AF120668 | DQ280041 |

|              |                                    |          |                   |          |          |          |          |          |
|--------------|------------------------------------|----------|-------------------|----------|----------|----------|----------|----------|
|              | <i>Chlamys varia</i>               | DQ279939 | DQ279962          | DQ279962 | DQ279962 | DQ280003 |          | DQ280033 |
|              | <i>Corbicula fluminea/japonica</i> | AF120557 | AB126330          | AB126330 | AB126330 | AY070161 | AF120666 | DQ280039 |
|              | <i>Cumberlandia monodonta</i>      | AY579105 |                   |          |          | AY579144 | AY579131 | AY579089 |
|              | <i>Dreissena polymorpha</i>        | AF120552 | AF131006          |          |          | AY070165 | AF120663 | DQ280038 |
|              | <i>Gastrochaena gigantea</i>       | AM774515 | AM779689          |          |          |          |          |          |
|              | <i>Laternula elliptica</i>         | AY192687 | EU734752          |          |          |          |          | GU227003 |
|              | <i>Limaria hians/fragilis</i>      | AF120534 | AB102742          | AB102742 | AB102742 | AY070152 | AF120650 |          |
|              | <i>Lyonsia floridana</i>           | AF120540 |                   |          |          |          | AF120654 |          |
|              | <i>Margaritifera auricularia</i>   | AY579097 |                   | AY579113 |          | AY579137 | AY579125 | DQ280035 |
|              | <i>Mercenaria mercenaria</i>       | AF120559 | AF131019          |          |          | DQ280008 | DQ399403 | DQ280040 |
|              | <i>Mya arenaria</i>                | AF120560 | AB126332          | AB126332 | AB126332 | AY377770 | AY070140 | AY377618 |
|              | <i>Mytilus galloprovincialis</i>   | L33452   | AB103129          | AB103129 | AB103129 | AY267748 | AY497292 | AY497292 |
|              | <i>Neotrigonia margaritacea</i>    | AF411690 | DQ279963          | DQ279963 |          | AY070155 | U56850   | DQ280034 |
|              | <i>Nucula sulcata</i>              | DQ279937 | DQ279960          | DQ279960 | DQ279960 | DQ280001 | DQ280017 | DQ280029 |
|              | <i>Nuculana minuta</i>             | DQ279938 | DQ279961          | DQ279961 | DQ279961 | DQ280002 | DQ280018 | DQ280030 |
|              | <i>Ostrea edulis</i>               | L49052   | AF137047/AF120596 |          |          | AY070151 | AF120651 | DQ280032 |
|              | <i>Pandora arenosa</i>             | AF120539 |                   | AF120601 |          |          |          |          |
|              | <i>Phaxas pellucidus</i>           | DQ279941 | AY145420          | AY145420 | AY145420 | DQ280006 | DQ280019 | DQ280036 |
|              | <i>Pteria hirundo/loveni</i>       | AF120532 | AB102767          | AB102767 | AB102767 |          | AF120647 | DQ280031 |
|              | <i>Solemya velum</i>               | AF120524 | AY145421          | AY145421 | AY145421 | AY070146 | U56852   | DQ280028 |
|              | <i>Thraciopsis angustata</i>       | AM774491 | AM779664          |          |          |          |          |          |
|              | <i>Yoldia limatula</i>             | AF120528 | AY145424          | AY145424 | AY145424 | AY070149 | AF120642 |          |
| Caudofoveata | <i>Chaetoderma nitidulum</i>       | AY377658 |                   | FJ445775 |          | AY377763 | AY377726 | AY377612 |
|              | <i>Scutopus ventrolineatus</i>     | X91977   |                   |          |          |          |          |          |
| Cephalopoda  | <i>Bathypolypus arcticus</i>       | AY557465 |                   | AY557554 |          |          | AF000029 | DQ280044 |
|              | <i>Nautilus pompilius</i>          | AY557455 |                   | AY145417 |          |          | AY557514 | AY377628 |
|              | <i>Nautilus scrobiculatus</i>      | AF120504 |                   | AF120567 |          | AF033704 |          | U11606   |
|              | <i>Stauroteuthis syrtensis</i>     | AY557457 |                   |          |          | AY557406 | AF000067 | DQ280042 |
|              | <i>Vampyroteuthis infernalis</i>   | AY557459 | AH012197          | AH012197 | AH012197 | AY557408 | AF000071 | DQ280043 |
| Gastropoda   | <i>Acmaea mitra</i>                | AB282760 | AB282781          | AB282781 | AB282781 |          | AB238459 | AB106518 |

|                                     |          |          |          |          |          |          |          |          |
|-------------------------------------|----------|----------|----------|----------|----------|----------|----------|----------|
| <i>Addisonia excentrica</i>         | AY603096 |          |          |          |          |          |          |          |
| <i>Addisonia sp.</i> (ZSM 20041021) | KF527260 |          | KF527269 | KF527269 |          | KF527283 |          |          |
| <i>Alcacia dysonia</i>              | DQ093428 |          | DQ279974 | DQ279974 |          | DQ093496 |          | DQ093469 |
| <i>Anatoma euglypta</i>             | AY923897 |          |          |          |          | AY923971 | AY923934 |          |
| <i>Aperostoma palmeri</i>           | DQ093435 | DQ279983 | DQ279983 | DQ279983 |          | DQ093505 | DQ093523 | DQ093479 |
| <i>Balcis eburnea</i>               | AF120519 |          | AF120576 |          |          |          | AF120636 | DQ280051 |
| <i>Bathyacmaea nipponica</i>        | AB282772 | AB282793 |          |          |          |          | AB238588 | AB238451 |
| <i>Bathymargarites symplector</i>   | DQ093433 | DQ279982 | DQ279982 | DQ279982 | DQ279982 | DQ093503 | DQ093521 | DQ093477 |
| <i>Bayerotrochus midas 1</i>        | AF120510 |          | DQ093453 |          |          | DQ093500 | AY296820 | DQ093474 |
| <i>Bayerotrochus midas 2</i>        | FJ977637 | FJ977668 | FJ977668 | FJ977668 |          |          |          |          |
| <i>Bolinus brandaris</i>            | DQ279944 | DQ279986 | DQ279986 | DQ279986 |          | DQ280010 | DQ280020 | DQ280052 |
| <i>Cellana nigrolineata</i>         | DQ013353 |          | DQ279971 |          |          | DQ093493 | DQ093515 | DQ093467 |
| <i>Cinnalepeta pulchella</i>        |          |          | AB087192 | AB087192 |          |          |          |          |
| <i>Coccapigya punctoradiata</i>     | AB282774 | AB282795 |          |          |          |          | AB238590 | AB238453 |
| <i>Cocculina messingi/sp.</i>       | AF120508 | DQ279973 | DQ279973 | DQ279973 |          | AY377777 | AY377731 | AY377624 |
| <i>Crepidula fornicata</i>          | AY377660 |          |          |          |          | AY377778 | AF353154 | AY377625 |
| <i>Cyathernia naticoides</i>        | DQ093430 | DQ279977 | DQ279977 | DQ279977 |          | DQ093498 | DQ093518 | DQ093472 |
| <i>Depressigyra globulus</i>        | DQ093431 | DQ279978 | DQ279978 | DQ279978 | DQ279978 | AF033689 | DQ093519 | DQ093473 |
| <i>Diodora graeca</i>               | AF120513 | DQ279980 | DQ279980 | DQ279980 | DQ279980 | DQ093502 | AF120632 | DQ093476 |
| <i>Entemnotrochus adansonianus</i>  | AF120509 | DQ279979 | DQ279979 | DQ279979 |          | AY377774 |          | AY377621 |
| <i>Eoacmaea conoidalis</i>          | AB282757 | AB282778 |          |          |          |          | AB238505 | AB238375 |
| <i>Erginus sybaritica</i>           | AB282761 | AB282782 | AB282782 | AB282782 |          |          | AB238461 | AB238350 |
| <i>Eulepetopsis vitrea</i>          | DQ093427 | DQ279972 | DQ279972 |          |          | DQ093495 | DQ093516 | DQ093468 |
| <i>Haliotis tuberculata/discus</i>  | AF120511 | AY145418 | AY145418 | AY145418 | AY145418 | AY070145 | AY377729 | AY377622 |
| <i>Lepeta caeca pacifica</i>        | AB282759 | AB282780 | AB282780 | AB282780 |          |          | AB238458 | AB238347 |
| <i>Lepetodrilus elevatus</i>        | DQ093432 | AY145413 | AY145413 | AY145413 | AY145413 | DQ093501 | DQ093520 | DQ093475 |
| <i>Leptogyropsis inflata</i>        | AB365313 |          |          |          |          | AB365300 | AB365258 |          |
| <i>Littorina littorea</i>           | DQ093437 | DQ279985 | DQ279985 |          |          | DQ093507 | DQ093525 | DQ093481 |
| <i>Lottia gigantea</i>              | AB282762 | AB282783 | AB282783 | AB282783 |          |          | AB238466 | AB106498 |
| <i>Micromelo undatus</i>            | DQ093443 |          | DQ279995 |          |          | DQ093513 |          | DQ093487 |

|                                            |          |          |          |          |          |          |          |
|--------------------------------------------|----------|----------|----------|----------|----------|----------|----------|
| <i>Mikadotrochus beyrichii</i>             | AM048636 | AM048695 | AM048695 | AM048695 |          | AM049331 |          |
| <i>Nacella magellanica</i>                 | AB282769 | AB282790 | AB282790 |          | AB433689 | EU870985 | AB238433 |
| <i>Neomphalus fretterae</i>                | AY090806 |          |          |          |          |          |          |
| <i>Nerita funiculata</i>                   | DQ093429 |          | DQ279976 | DQ279976 |          | DQ093517 | DQ093471 |
| <i>Neritilia rubida</i>                    |          |          | AB087190 | AB087190 |          |          |          |
| <i>Neritopsis radula</i>                   |          |          | AB087186 |          |          |          |          |
| <i>Nipponacmea concinna</i>                | DQ013354 |          |          |          |          | AB238486 | AB106511 |
| <i>Notocrater houbricki</i>                | L78881   |          |          |          | AF033700 | AY296822 |          |
| <i>Onchidella sp.</i>                      | DQ093441 |          | DQ279992 |          | DQ093511 | DQ093529 | DQ093485 |
| <i>Ophicardelus ornatus</i>                | DQ093442 |          |          |          | DQ093512 | DQ093530 | DQ093486 |
| <i>Orbitestella vera</i>                   | FJ917207 | FJ917239 | FJ917239 |          | EF561623 | FJ917268 | FJ917250 |
| <i>Paralepetopsis sp.</i>                  | FJ977635 | FJ977665 | FJ977665 |          | FJ977728 | FJ977752 | FJ977699 |
| <i>Patella vulgata</i>                     | AB282770 | AB282791 | AB282791 | AB282791 |          | AB238580 | AB238445 |
| <i>Pectinodonta rhyssa</i>                 | AB282773 | AB282794 | AB282794 | AB282794 |          | AB238589 | AB238452 |
| <i>Peltospira delicata</i>                 | AY923893 |          |          |          | AY923967 | AY923931 |          |
| <i>Phenacolepas osculans</i>               | AY923890 |          |          |          |          | AY923928 |          |
| <i>Philine aperta</i>                      | DQ093438 | DQ279988 | DQ279988 | DQ279988 | DQ093508 |          | DQ093482 |
| <i>Pisulina adamsiana</i>                  |          |          | AB087191 | AB087191 |          |          |          |
| <i>Pomacea bridgesi</i>                    |          |          | DQ279984 | DQ279984 | DQ093506 | DQ093524 | DQ093480 |
| <i>Puncturella conica</i> (ZSM 20021400)   | KF527257 |          | KF527266 | KF527266 | KF527278 |          | KF527251 |
| <i>Pyropelta sp.</i>                       | FJ977636 | FJ977666 | FJ977666 | FJ977666 | FJ977729 | FJ977753 | FJ977700 |
| <i>Raphitoma linearis</i>                  | DQ279945 |          | DQ279987 |          | DQ280011 |          | DQ280053 |
| <i>Salinator solida</i>                    | DQ093440 | DQ279991 | DQ279991 | DQ279991 | DQ093510 | DQ093528 | DQ093484 |
| <i>Scissurella coronata</i>                | AM048637 | AM048696 | AM048696 |          |          |          |          |
| <i>Scutellastra optima</i>                 | AB282771 | AB282792 |          |          |          | AB238585 | AB106482 |
| <i>Seguenzia antarctica</i> (ZSM 20051133) | KF527261 |          | KF527270 | KF527270 | KF527279 |          | KF527253 |
| <i>Sinezona confusa</i>                    | AF120512 | DQ279981 | DQ279981 | DQ279981 | AY377773 |          |          |
| <i>Siphonaria pectinata</i>                | X91973   | DQ279993 | DQ279993 |          | AY377780 | AF120638 | AY377627 |
| <i>Theodoxus fluviatilis</i>               | AF120515 |          | DQ279975 | DQ279975 |          | AF120633 | DQ093470 |
| <i>Titiscania sp.</i> (ZSM 20060276)       | KF527262 |          | KF527271 | KF527271 | KF527280 |          | KF527254 |



|                |                                                     |          |          |          |          |          |          |          |
|----------------|-----------------------------------------------------|----------|----------|----------|----------|----------|----------|----------|
|                | <i>Tricolia variabilis</i>                          | AB365304 |          |          |          | AB365267 | AB365219 |          |
|                | <i>Truncatella guerini</i>                          | AF120518 |          | AF120575 |          |          | AF120635 |          |
|                | <i>Valvata piscinalis</i>                           | FJ917222 | FJ917224 | FJ917224 | FJ917224 | FJ917224 | FJ917267 | FJ917248 |
|                | <i>Viviparus georginaus</i>                         | AF120516 |          | AF120574 |          | AY377779 | AF120634 | AY377626 |
| Monoplacophora | <i>Laevipilina antarctica</i>                       |          |          | DQ279958 |          |          |          |          |
|                | <i>Laevipilina antarctica</i> (DNABANK-Moll-MS-016) | KF527265 |          | KF527274 | KF527274 | KF527276 |          | KF527256 |
|                | <i>Laevipilina hyalina 1</i>                        | FJ445774 | FJ445777 | FJ445777 | FJ445777 | FJ445778 | FJ445781 | FJ445782 |
|                | <i>Laevipilina hyalina 2</i>                        | FJ449542 | FJ449541 | FJ449541 | FJ449541 |          | FJ449540 | FJ449543 |
|                | <i>Micropilina sp.</i> (DNABANK-Moll-MS-001)        | KF527263 |          | KF527272 | KF527272 | KF527277 |          | KF527255 |
|                | <i>Neopilimidae sp.</i> (DNABANK-Moll-MS-002)       | KF527264 |          | KF527273 | KF527273 | KF527275 |          |          |
|                | <i>Veleropilina seisuimaruae</i>                    | AB669192 | AB669193 | AB669193 | AB669193 | AB669193 | AB669194 | AB669195 |
| Polyplacophora | <i>Acanthochitona crinita</i>                       | AF120503 | DQ279957 | DQ279957 | DQ279957 | AY377759 | AF120627 | AY377609 |
|                | <i>Callistochiton antiquus</i>                      | AY377645 | DQ279953 | DQ279953 | DQ279953 | AY377749 | AY377712 | AY377599 |
|                | <i>Callochiton septemvalvis</i>                     | AY377632 |          | DQ279952 | DQ279952 | AY377736 | AY377700 |          |
|                | <i>Chaetopleura apiculata</i>                       | AY377636 | AY145398 | AY145398 | AY145398 | AY377741 | AY377704 | AY377590 |
|                | <i>Chiton olivaceus</i>                             | AY377651 |          | DQ279955 | DQ279955 | AY377755 | AY377716 | AY377605 |
|                | <i>Cryptochiton stelleri</i>                        |          |          | AY377686 |          | AY377760 | AY377720 | AY377610 |
|                | <i>Cryptoplax japonica</i>                          | AY377656 | AY145402 | AY145402 | AY145402 | AY377761 | FJ445780 | AY377611 |
|                | <i>Ischnochiton comptus</i>                         | AY377639 | AY145412 | AY145412 | AY145412 | AY377744 | AY377709 | AY377593 |
|                | <i>Lepidopleurus cajetanus</i>                      | AF120502 | FJ445776 | FJ445776 | FJ445776 | AY377735 | AF120626 | AY377585 |
|                | <i>Lepidopleurus cajetanus</i> (ZSM 20040267)       | KF527259 |          | KF527268 | KF527268 | KF527282 |          | KF527252 |
|                | <i>Leptochiton intermedius</i> (ZSM 20040266)       | KF527258 |          | KF527267 | KF527267 | KF527281 |          |          |
|                | <i>Leptochiton asellus</i>                          | AY377631 | AY145414 | AY145414 | AY145414 | AY377734 | FJ461256 | AY377586 |
|                | <i>Lorica volvox</i>                                | AY377647 | DQ279954 | DQ279954 | DQ279954 | AY377751 |          | AY377601 |
|                | <i>Mopalia muscosa</i>                              | AY377648 | DQ279956 | DQ279956 | DQ279956 | AY377752 |          | AY377602 |
|                | <i>Tonicella lineata</i>                            | AY377635 |          | AY377665 |          | AY377739 | AY377702 | AY377588 |
| Scaphopoda     | <i>Antalis entalis</i>                              | DQ279936 | AY145388 | AY145388 | AY145388 | DQ280000 | DQ280016 | DQ280027 |
|                | <i>Antalis pilsbryi</i>                             | AF120522 |          | AF120579 |          |          | AF120639 |          |
|                | <i>Cadulus subfusiformis</i>                        | AF490603 |          |          |          |          |          |          |
|                | <i>Dentalium inaequicostatum</i>                    | DQ279935 |          | DQ279959 | DQ279959 | DQ279999 | DQ280015 | DQ280026 |

|               |                                  |          |          |          |          |          |
|---------------|----------------------------------|----------|----------|----------|----------|----------|
|               | <i>Entalina tetragona</i>        | AF490598 |          |          |          |          |
|               | <i>Fustiaria rubescens</i>       | AF490597 |          |          |          |          |
|               | <i>Pulsellum affine</i>          | AF490600 |          |          |          |          |
|               | <i>Rhabdus rectius</i>           | AF120523 | AF120580 | AY377772 | AF120640 | AY377619 |
|               | <i>Siphonodentalium lobatum</i>  | AF490601 |          |          |          |          |
| Solenogastres | <i>Epimenia sp.</i>              | AY377657 | AY377691 | AY377765 | AY377723 | AY377615 |
|               | <i>Epimenia australis</i>        |          | AY377689 | AY377767 | AY377722 | AY377614 |
|               | <i>Epimenia babai</i>            | AY212107 | AY377690 | AY377766 | AY377724 | AY377616 |
|               | <i>Micromenia fodiens</i>        | FJ649601 |          |          |          |          |
|               | <i>Simrothiella margaritacea</i> | FJ649600 |          |          |          |          |
|               | <i>Wirenia argentea</i>          | FJ649599 |          |          |          |          |

Supplementary Table 3A

|                | <b>Species</b>                  | <b>18S</b> | <b>28S1</b> | <b>28S2</b> | <b>28S3</b> | <b>28S4</b> | <b>H3</b> | <b>COI</b> | <b>16S</b> |
|----------------|---------------------------------|------------|-------------|-------------|-------------|-------------|-----------|------------|------------|
| Annelida       | <i>Eunice pennata</i>           |            |             |             |             |             |           | AY838870   |            |
|                | <i>Lineus bilineatus</i>        | DQ279932   |             |             | DQ279947    | DQ279947    |           |            |            |
| Bivalvia       | <i>Cardita calyculata</i>       |            |             |             |             |             | AY070156  |            |            |
|                | <i>Cumberlandia monodonta</i>   |            | AF305382    |             |             |             |           |            |            |
| Brachiopoda    | <i>Eohemithiris grayi</i>       |            |             |             |             |             |           | AB053200   |            |
|                | <i>Lingula adamsi</i>           |            |             |             |             |             |           | AB128054   |            |
|                | <i>Terebratulina retusa</i>     |            |             |             |             |             |           | NC000941   |            |
| Cephalopoda    | <i>Nautilus pompilius</i>       |            | AY145417    |             | AY145417    | AY145417    |           |            |            |
|                | <i>Stauroteuthis syrtensis</i>  |            |             | DQ279968    | DQ279968    |             |           |            |            |
| Cycliophora    | <i>Symbion pandora</i>          |            |             |             |             |             | AY218153  |            |            |
| Gastropoda     | <i>Coccolpiza punctoradiata</i> |            |             |             |             |             |           | AB365301   |            |
|                | <i>Crepidula fornicata</i>      |            | AY145406    | AY145406    | AY145406    | AY145406    |           |            |            |
|                | <i>Nerita funiculata</i>        |            |             |             |             |             | DQ093497  |            |            |
|                | <i>Neritilia rubida</i>         |            |             |             |             |             |           | AB102712   |            |
|                | <i>Neritopsis radula</i>        |            |             |             | AB087186    |             |           |            |            |
|                | <i>Ophicardelus ornatus</i>     |            | DQ279994    | DQ279994    | DQ279994    |             |           |            |            |
|                | <i>Pomacea bridgesi</i>         | DQ093436   |             |             |             |             |           |            |            |
|                | <i>Scissurella coronata</i>     |            |             |             |             |             |           | AM049332   | AM116867   |
|                | <i>Sinezona confusa</i>         |            |             |             |             |             | AF120631  |            |            |
| Nemertea       | <i>Hubrechtella dubia</i>       |            |             |             |             |             | AJ436987  |            |            |
| Polyplacophora | <i>Mopalia muscosa</i>          |            |             |             |             |             | AY377713  |            |            |

## Supplementary Table 3B

|                 | Species                              | 28S2                |
|-----------------|--------------------------------------|---------------------|
| <b>Bivalvia</b> | <i>Gastrochaena gigantea</i>         | AM779689            |
|                 | <i>Thraciopsis angustata</i>         | AM779664            |
|                 | <i>Solemya velum</i>                 | AY145421            |
|                 | <i>Nucula sulcata</i>                | DQ279960            |
|                 | <i>Nuculana minuta</i>               | DQ279961            |
|                 | <i>Yoldia limatula</i>               | AY145424            |
|                 | <i>Mytilus galloprovincialis</i>     | AB103129            |
|                 | <i>Arca imbricata/ventricosa</i>     | AB101612            |
|                 | <i>Pteria hirundo/loveni</i>         | AB102767            |
|                 | <i>Ostrea edulis</i>                 | AF137047 + AF120596 |
|                 | <i>Limaria hians/fragilis</i>        | AB102742            |
|                 | <i>Anomia ephippium/sinensis</i>     | AB102739            |
|                 | <i>Chlamys varia</i>                 | DQ279962            |
|                 | <i>Neotrigonia margaritacea</i>      | DQ279963            |
|                 | <i>Anodonta sp.</i>                  | DQ279964            |
|                 | <i>Abra nitida</i>                   | DQ279965            |
|                 | <i>Phaxas pellucidus</i>             | AY145420            |
|                 | <i>Dreissena polymorpha</i>          | AF131006            |
|                 | <i>Corbicula fluminea / japonica</i> | AB126330            |
|                 | <i>Mercenaria mercenaria</i>         | AF131019            |
|                 | <i>Mya arenaria</i>                  | AB126332            |
|                 | <i>Astarte castanea</i>              | AF131001            |
|                 | <i>Cardita leana</i>                 | AM779655            |

Supplementary Table 4

| Data set                           | Number of taxa | Total length of alignment (aligned with Mafft, masked with Aliscore) | Model of sequence evolution (AIC) | Proportion of invariable sites | Gamma distribution shape parameter |
|------------------------------------|----------------|----------------------------------------------------------------------|-----------------------------------|--------------------------------|------------------------------------|
| 16S (142 taxa)                     | 87             | 519                                                                  | TVM+I+G                           | 0.1554                         | 0.6522                             |
| 18S (142 taxa)                     | 133            | 3617                                                                 | GTR+I+G                           | 0.1739                         | 0.5009                             |
| 28S (142 taxa)                     | 118            | 3583                                                                 | GTR+I+G                           | 0.2126                         | 0.5255                             |
| H3 (142 taxa) all codon positions  | 94             | 322                                                                  | TVM+I+G                           | 0.5221                         | 1.0204                             |
| H3 (142 taxa) 1st codon position   | 94             | 322                                                                  | SYM+I                             | 0.8382                         | equal                              |
| H3 (142 taxa) 2nd codon position   | 94             | 322                                                                  | GTR+G                             | -                              | 1.7209                             |
| H3 (142 taxa) 3rd codon position   | 94             | 322                                                                  | GTR+I+G                           | 0.5797                         | 2.5094                             |
| COI (142 taxa) all codon positions | 92             | 678                                                                  | GTR+G                             | -                              | 0.2944                             |
| COI (142 taxa) 1st codon position  | 92             | 678                                                                  | GTR+I+G                           | 0.1649                         | 0.6211                             |
| COI (142 taxa) 2nd codon position  | 92             | 678                                                                  | GTR+G                             | -                              | 0.7885                             |
| COI (142 taxa) 3rd codon position  | 92             | 678                                                                  | GTR+I+G                           | 0.2253                         | 0.8226                             |
| 16S (81 taxa)                      | 51             | 459                                                                  | GTR+I+G                           | 0.1784                         | 0.7234                             |
| 18S (81 taxa)                      | 78             | 3449                                                                 | GTR+I+G                           | 0.1271                         | 0.4028                             |
| 28S (81 taxa)                      | 68             | 3465                                                                 | GTR+I+G                           | 0.2235                         | 0.4999                             |
| H3 (81 taxa) all codon positions   | 55             | 327                                                                  | GTR+I+G                           | 0.5395                         | 1.3596                             |
| H3 (81 taxa) 1st codon position    | 55             | 327                                                                  | SYM+I                             | 0.8289                         | equal                              |
| H3 (81 taxa) 2nd codon position    | 55             | 327                                                                  | SYM+I+G                           | 0.0332                         | 2.0347                             |
| H3 (81 taxa) 3rd codon position    | 55             | 327                                                                  | GTR+I+G                           | 0.5940                         | 7.1635                             |
| COI (81 taxa) all codon positions  | 51             | 666                                                                  | GTR+G                             | -                              | 0.2723                             |
| COI (81 taxa) 1st codon position   | 51             | 666                                                                  | GTR+I+G                           | 0.2019                         | 0.6262                             |
| COI (81 taxa) 2nd codon position   | 51             | 666                                                                  | GTR+G                             | -                              | 0.4874                             |
| COI (81 taxa) 3rd codon position   | 51             | 666                                                                  | GTR+I+G                           | 0.2320                         | 0.7413                             |
| 16S (Gastropods)                   | 53             | 531                                                                  | TVM+I+G                           | 0.1968                         | 0.9294                             |
| 18S (Gastropods)                   | 67             | 1959                                                                 | TrN+I+G                           | 0.1772                         | 0.4059                             |
| 28S (Gastropods)                   | 62             | 2808                                                                 | GTR+I+G                           | 0.2945                         | 0.4736                             |

|                                             |    |     |         |        |        |
|---------------------------------------------|----|-----|---------|--------|--------|
| <b>H3 (Gastropods) all codon positions</b>  | 47 | 326 | GTR+I+G | 0.5564 | 1.3578 |
| <b>H3 (Gastropods) 1st codon position</b>   | 47 | 326 | SYM+I+G | 0.7580 | 0.1501 |
| <b>H3 (Gastropods) 2nd codon position</b>   | 47 | 326 | GTR+I+G | 0.0330 | 0.7695 |
| <b>H3 (Gastropods) 3rd codon position</b>   | 47 | 326 | GTR+I   | 0.6461 | equal  |
| <b>COI (Gastropods) all codon positions</b> | 51 | 672 | GTR+I+G | 0.2489 | 0.4266 |
| <b>COI (Gastropods) 1st codon position</b>  | 51 | 672 | GTR+I+G | 0.2541 | 0.6279 |
| <b>COI (Gastropods) 2nd codon position</b>  | 51 | 672 | GTR+G   | -      | 0.6405 |
| <b>COI (Gastropods) 3rd codon position</b>  | 51 | 672 | GTR+I+G | 0.2950 | 0.7110 |

Supplementary Table 5

| <b>Data set</b>                                                     | <b>Variations on data sets</b>                                           | <b>Partition</b>                                                                        | <b>Alignment length</b> | <b>proportion of gaps</b>       |
|---------------------------------------------------------------------|--------------------------------------------------------------------------|-----------------------------------------------------------------------------------------|-------------------------|---------------------------------|
| 142 taxa                                                            | -                                                                        | 9: 16S, 18S, 28S, COI 1st, 2nd, 3rd codon position, H3 1st, 2nd, 3rd codon position     | 8721                    | 60%                             |
| 81 taxa                                                             | -                                                                        | 9: 16S, 18S, 28S, COI-1st, -2nd, -3rd codon position, H3-1st, -2nd, -3rd codon position | 8367                    | 57%                             |
| 134 taxa, without Aplacophora                                       | exclusion of Aplacophora; exclusion of 3rd codon positions of COI and H3 | 5: 16S, 18S, 28S, COI, H3                                                               | 8122                    | 58%                             |
| 74 taxa, without Aplacophora                                        | exclusion of Aplacophora; exclusion of 3rd codon positions of COI and H3 | 5: 16S, 18S, 28S, COI, H3                                                               | 7812                    | 55%                             |
| 142 taxa                                                            | COI and H3 coded as amino acids                                          | 5: 16S, 18S, 28S, COI (aa), H3 (aa)                                                     | 8052                    | 62% (16S-18S-28S); 25% (COI-H3) |
| 142 taxa                                                            | only fragments 18S, 28S and H3 are used                                  | 5: 18S, 28S, H3-1st, -2nd, -3rd codon position                                          | 7527                    | 61%                             |
| Gastropods (67 gastropods including patellogastropods, 6 outgroups) | only gastropod taxa are used (including Patellogastropoda)               | 9: 16S, 18S, 28S, COI-1st, -2nd, -3rd codon position, H3-1st, -2nd, -3rd codon position | 6296                    | 53%                             |

Supplementary Table 6

| <b>Data set</b>                                     | <b>saturation</b> | <b>Iss</b> | <b>Iss c Sym (P)</b> |
|-----------------------------------------------------|-------------------|------------|----------------------|
| <b>H3 (142 taxa) all codon positions</b>            | no                | 0,330      | < 0,692 (0,0000)     |
| <b>H3 (142 taxa) 1st and 2nd codon positions</b>    | no                | 0,215      | < 0,749 (0,0000)     |
| <b>H3 (142 taxa) 3rd codon position</b>             | no                | 0,192      | < 0,949 (0,0000)     |
| <b>COI (142 taxa) all codon positions</b>           | no                | 0,410      | < 0,697 (0,0000)     |
| <b>COI (142 taxa) 1st and 2nd codon positions</b>   | no                | 0,239      | < 0,683 (0,0000)     |
| <b>COI (142 taxa) 3rd codon position</b>            | yes               | 0,918      | > 0,720 (0,0000)     |
| <b>H3 (81 taxa) all codon positions</b>             | no                | 0,392      | < 0,689 (0,0000)     |
| <b>H3 (81 taxa) 1st and 2nd codon positions</b>     | no                | 0,045      | < 0,722 (0,0000)     |
| <b>H3 (81 taxa) 3rd codon position</b>              | no                | 0,814      | < 1,039 (0,0001)     |
| <b>COI (81 taxa) all codon positions</b>            | no                | 0,418      | < 0,703 (0,0000)     |
| <b>COI (81 taxa) 1st and 2nd codon positions</b>    | no                | 0,251      | < 0,685 (0,0000)     |
| <b>COI (81 taxa) 3rd codon position</b>             | yes               | 0,925      | > 0,704 (0,0000)     |
| <b>H3 (Gastropods) all codon positions</b>          | no                | 0,414      | < 0,687 (0,0000)     |
| <b>H3 (Gastropods) 1st and 2nd codon positions</b>  | no                | 0,046      | < 0,715 (0,0000)     |
| <b>H3 (Gastropods) 3rd codon position</b>           | no                | 0,842      | < 1,009 (0,0001)     |
| <b>COI (Gastropods) all codon positions</b>         | no                | 0,466      | < 0,706 (0,0000)     |
| <b>COI (Gastropods) 1st and 2nd codon positions</b> | no                | 0,164      | < 0,687 (0,0000)     |
| <b>COI (Gastropods) 3rd codon position</b>          | yes               | 0,929      | > 0,700 (0,0000)     |



## Supplementary Table 7

| Calibration node on preferred tree | Fossil calibration            | Date range (Ma) | Reference                   | Prior settings in BEAST v. 1.6.1 (distribution; gamma shape, gamma scale, zero offset) |
|------------------------------------|-------------------------------|-----------------|-----------------------------|----------------------------------------------------------------------------------------|
| 1 Mollusca                         | first shell record            | ~ 545           | Parkhaev 2008               | Gamma; 2.5, 2.0, 542.0                                                                 |
| 2 Serialia/Bivalvia                | <i>Fordilla</i>               | ~ 530           | Parkhaev 2008               | Gamma; 3.3, 2.2, 525.0                                                                 |
| 3 Cephalopoda/Solenogastres        | <i>Plectronoceras</i>         | ~ 505           | Nishiguchi and Mapes 2008   | Gamma; 2.4, 7.0, 495.0                                                                 |
| 4 Polyplacophora/Monoplacophora    | <i>Orthiochiton</i>           | ~ 490           | Vendrasco and Runnegar 2004 | Gamma; 5.0, 5.0, 470.0                                                                 |
| 5 Origin of Pteriomorpha           | Cyrtodontidae                 | ~ 475           | Pojeta 1978                 | Gamma; 1.9, 9.5, 465.0                                                                 |
| 6 Origin of Caenogastropoda        | Sublitoidea                   | ~ 418           | Nützel et al. 2000          | Gamma; 2.3, 9.0, 405.0                                                                 |
| 7 Scaphopoda                       | <i>Dentalium</i>              | ~ 353           | Yochelson 1999              | Gamma; 2.2, 6.7, 345.0                                                                 |
| 8 <i>Astarte/Cardita</i>           | <i>Astartella concentrica</i> | ~ 322           | Hoare et al. 1989           | Gamma; 2.6, 5.0, 315.0                                                                 |
| 9 Polyplacophora                   | <i>Leptochiton davolii</i>    | ~ 231           | Laghi 2005                  | Gamma; 5.0, 2.7, 220.0                                                                 |

Parkhaev PY: **The early molluscan radiation.** In: *Phylogeny and evolution of the Mollusca*. Edited by Ponder WF, Lindberg DR. Berkeley, Univ. California Press 2008, 33-69.

Nishiguchi MK, Mapes RH: **Cephalopoda.** In: *Phylogeny and evolution of the Mollusca*. Edited by Ponder WF, Lindberg DR. Berkeley, Univ. California Press 2008, 163-199.

Vendrasco MJ, Runnegar B: **Late Cambrian and Early Ordovician stem group chitons (Mollusca: Polyplacophora) from Utah and Missouri.** *J Paleontol* 2004, **78**:675-689.

Pojeta J: **The origin and early taxonomic diversification of pelecypods.** *Phil Trans R Soc Lond B* 1978, **284**:225-246.

Nützel A, Erwin DH, Mapes RH: **Identity and phylogeny of the Late Paleozoic Sublitoidea (Gastropoda).** *J Paleontol* 2000, **74**:575-598.

Yochelson EL: **Scaphopoda.** In: *Functional morphology of the invertebrate skeleton*. Edited by Savazzi E. Chichester. John Wiley and Sons 1999, 363-377.

Hoare RD, Heaney III MJ, Mapes RH: **Bivalves (Mollusca) from the Imo Formation (Mississippian, Chesterian) of North-Central Arkansas.** *J Paleontol* 1989, **63**:582-603.

Laghi GF: **Upper triassic chitons from the Italian Dolomites.** *Lav Sci Nat* 2005, **30**:79-84.

## Supplementary Table 8

|                                              | <b>time estimation<br/>(BEAST v. 1.6.1)</b> |
|----------------------------------------------|---------------------------------------------|
| <b>Calibrated nodes</b>                      |                                             |
| Diversification of Mollusca                  | 551,02 (542,88-559,94)                      |
| Split Serialia/Bivalvia                      | 530,93 (525,89-536,72)                      |
| Split Cephalopoda/Solenogastres              | 504,92 (495,72-516,34)                      |
| Split Polyplacophora/Monoplacophora          | 493,06 (476,69-511,76)                      |
| Origin of Pteriomorpha                       | 475,07 (465,17-487,24)                      |
| Origin of Caenogastropoda                    | 421,49 (405,93-441,94)                      |
| Diversification of Scaphopoda                | 359,95 (345,61-379,28)                      |
| Split <i>Astarte/Cardita</i>                 | 325,43 (315,69-337,77)                      |
| Diversification of Polyplacophora            | 233,44 (223,22-244,78)                      |
| <b>Major molluscan groups</b>                |                                             |
| Diversification of Dorsoconcha               | 541,69 (532,24-551,28)                      |
| Diversification of Bivalvia                  | 495,69 (478,15-514,89)                      |
| Diversification of Gastropoda                | 493,14 (444,21-531,35)                      |
| Diversification of Monoplacophora            | 65,29 (30,36-110,8)                         |
| Diversification of Variozoa                  | 534,2 (515,99-550,29)                       |
| Split Caudofoveata/Cephalopoda+Solenogastres | 518,59 (501,75-536,16)                      |
| Diversification of Cephalopoda               | 364,19 (255,97-467,95)                      |
| Diversification of Solenogastres             | 195,61 (117,78-277,8)                       |
| Diversification of Caudofoveata              | 160,52 (19,5-274,97)                        |
